# Supplementary material for: Structure activity relationship and modeling studies of inhibitors of lysine specific demethylase 1
Source: PubMed Central journal article supplement (PMC5291514; doi:10.1371/journal.pone.0170301), 2017-02-03
Supplement: pone.0170301.s001.pdf [file pone.0170301.s001.pdf]

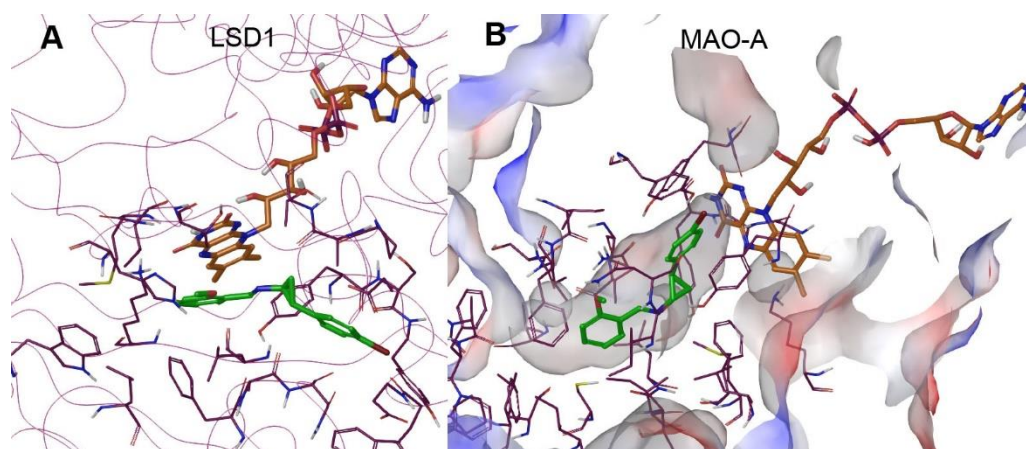

**Figure S1.** Docking results of compound **26** (as tube models with C atoms in green). **(A)** The lowest-energy docking structure in the active site of LSD1; and **(B)** The lowest-energy docking structure in the active site of MAO-A, showing selected interacting amino acid residues (with C atoms in purple) and FAD (with C atoms in brown).
