# Supplementary material for: Structure activity relationship and modeling studies of inhibitors of lysine specific demethylase 1
Source: PubMed Central journal article supplement (PMC5291514; doi:10.1371/journal.pone.0170301), 2017-02-03
Supplement: pone.0170301.s003.pdf [file pone.0170301.s003.pdf]

**Table S1.** Structures and LSD1 inhibitory activities of compounds **1-35** with embedded structures.

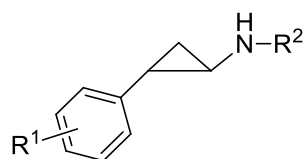

|           | R <sup>1</sup>        | R <sup>2</sup>    | LSD1 IC <sub>50</sub><br>(μM) |
|-----------|-----------------------|-------------------|-------------------------------|
| <b>1</b>  | 4-OBn                 |                   | 0.0098                        |
| <b>2</b>  | 4-(6-F-pyridin-3-yl)  | same as above     | 0.077                         |
| <b>3</b>  | 4-Br                  | same as above     | 0.035                         |
| <b>4</b>  | 4-(6-Cl-pyridin-3-yl) | same as above     | 0.15                          |
| <b>5</b>  | 2-Br                  | same as above     | >100                          |
| <b>6</b>  | 3-Br                  | same as above     | >100                          |
| <b>7</b>  | 4-OBn                 | -H                | 0.91                          |
| <b>8</b>  | 6-F-pyridin-3-yl      | -H                | 5.3                           |
| <b>9</b>  | 4-Br                  | -H                | 25                            |
| <b>10</b> | 4-Br                  |                   | 0.064                         |
| <b>11</b> | 4-Br                  |                   | 0.62                          |
| <b>12</b> | 4-Br                  |                   | 3.6                           |
| <b>13</b> | 4-H                   | same as <b>10</b> | 0.19                          |
| <b>14</b> | 4-H                   | same as <b>11</b> | 1.3                           |
| <b>15</b> | 4-Br                  |                   | 0.26                          |
| <b>16</b> | 4-H                   | same as above     | 0.062                         |
| <b>17</b> | 4-Br                  | -Bn               | 5.0                           |

|    |      |                                                                                     |      |
|----|------|-------------------------------------------------------------------------------------|------|
| 18 | 4-Br | -(4-OH)-Bn                                                                          | 94   |
| 19 | 4-Br | -(4-NH <sub>2</sub> )-Bn                                                            | >100 |
| 20 | 4-Br | -(4-NMe <sub>2</sub> )-Bn                                                           | 71   |
| 21 | 4-Br | (pyridin-4-yl)-methyl                                                               | >100 |
| 22 | 4-Br | -COCH <sub>3</sub>                                                                  | 15.4 |
| 23 | 4-Br | -CONHPh                                                                             | 7.4  |
| 24 | 4-Br | =CH-Ph                                                                              | 15.6 |
| 25 | 4-Br | =CH-(4-Br-Ph)                                                                       | 1.2  |
| 26 | 4-Br | =CH-(2-OMe-Ph)                                                                      | 0.74 |
| 27 | 4-Br | =CH-(3-OMe-Ph)                                                                      | 0.90 |
| 28 | 4-Br | =CH-(2,3,4-OMe-Ph)                                                                  | 94   |
| 29 | 4-Br | =CH-(4-NMe <sub>2</sub> -Ph)                                                        | 11   |
| 30 | 4-Br | =CH-(pyridine-4-yl)                                                                 | 14   |
| 31 | 4-H  | -NH <sub>2</sub>                                                                    | 5.8  |
| 32 | 4-H  | 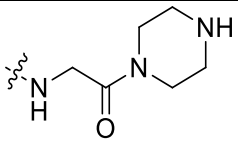  | 0.67 |
| 33 | 4-H  |  | 84   |
| 34 | 4-Br |  | 1.7  |
| 35 |      |  | 36.4 |
